# Supplementary material for: The effects of the flipped classroom in teaching evidence based nursing: A quasi-experimental study
Source: PLoS One. 2019 Jan 15;14(1):e0210606. doi: 10.1371/journal.pone.0210606 (PMC6333329; doi:10.1371/journal.pone.0210606)
Supplement: S1 File — (XLS) [file pone.0210606.s001.xls]

## Sheet: data
Group	No	T1	T2	T3	Rank	Educational level	ward	Gender	Marital status	age	Working years	Evidence-based course experience	Evidence-based practice experience	Sat.1	Sat.2	Sat.3	Sat.4	Sat.5	Sat.6	Sat.7	Sat.8	Sat.T	(B)SE1	(B)SE2	(B)SE3	(B)SE4	(B)SE5	(B)SE6	(B)SE7	(B)SE8	(B)SE9	(B)SE10	(B)SE11	(B)SET	(B)SE13	(F)SE1	(F)SE2	(F)SE3	(F)SE4	(F)SE5	(F)SE6	(F)SE7	(F)SE8	(F)SE9	(F)SE10	(F)SE11	(F)SE12	(F)SET	(1M)SE1
1	1	70	80	60	6	2	1	2	2	32	11	1	2	9	9	9	9	10	10	10	10	76	5	6	7	7	4	4	5	6	6	6	6	6	68	6	7	7	8	7	6	7	7	8	8	8	8	87	7
1	2	60	80		5	2	1	2	1	29	6	1	2	7	8	8	7	7	8	9	8	62	5	5	4	5	5	4	5	5	5	4	4	4	55	5	6	5	6	6	6	6	6	5	6	6	5	68
1	3	50	90		6	2	1	2	2	51	25	1	2	9	9	9	9	9	10	10	10	75	5	5	5	5	5	5	5	5	5	5	5	5	60	5	5	5	5	5	4	4	4	5	5	5	5	57
1	4	50	70	80	6	2	1	2	2	39	19	2	2	9	9	9	9	9	9	9	9	72	4	3	3	3	2	2	3	2	2	2	2	2	30	7	3	3	4	4	4	4	4	4	4	4	4	49	7
1	5	70	70		6	2	1	2	2	40	20	2	2	9	9	7	9	9	10	8	10	71	8	8	6	6	3	3	3	3	3	3	3	3	52	6	7	7	7	5	5	4	5	5	5	5	6	67
1	6	80	60	80	2	2	2	2	1	23	1	1	2	9	9	9	9	10	10	10	10	76	8	7	7	7	6	6	6	6	6	6	6	6	77	7	7	8	8	8	8	8	8	8	8	8	8	94	7
1	7	80	80		2	2	1	2	1	24	1	1	2	10	10	10	10	10	10	10	10	80	4	4	4	2	2	2	2	2	3	3	5	5	38	6	6	6	3	7	4	7	5	6	6	5	6	67
1	8	80	70	70	2	2	1	2	1	23	1	2	2	10	10	10	10	10	10	10	10	80	4	5	5	5	5	5	5	5	5	5	5	5	59	6	8	8	8	7	7	8	8	8	8	8	8	92	5
1	9	50	50	50	6	2	2	2	2	34	12	1	2	9	9	10	10	10	9	9	9	75	7	2	5	8	1	1	3	1	5	5	6	7	51	5	7	7	7	7	3	3	3	5	4	4	7	62	6
1	10	80	60	60	6	2	2	2	1	40	18	1	2	8	8	9	9	9	9	10	9	71	7	7	7	7	7	6	7	7	7	7	7	7	83	8	8	8	8	8	8	8	8	8	8	8	9	97	7
1	11	20	50		5	1	1	2	1	27	6	2	2	8	8	7	9	8	8	8	8	64	6	5	6	7	5	5	5	5	6	6	5	6	67	5	5	7	6	4	4	5	5	5	5	5	6	62
1	12	80	80	90	6	2	2	2	1	37	15	1	2	7	7	7	7	7	7	7	7	56	7	7	8	8	6	6	6	6	6	7	6	6	79	7	7	7	7	7	7	7	7	7	7	7	7	84	6
1	13	60	80		6	2	1	2	1	47	24	1	2	10	10	10	9	10	10	10	10	79	5	6	5	5	5	6	6	6	6	6	6	6	68	8	8	8	8	8	8	8	8	8	8	8	8	96
1	14	60	60		5	2	2	2	1	38	19	1	1	8	8	8	8	8	8	8	8	64	8	6	8	6	6	6	6	7	7	6	6	8	80	8	6	8	6	6	6	6	7	7	6	6	8	80
1	15	60	80		5	2	1	2	1	37	13	2	1	8	8	8	8	8	9	9	9	67	6	6	7	6	6	6	7	7	7	7	7	7	79	7	7	7	7	7	7	7	7	7	7	7	7	84
1	16	90	80		6	2	2	2	1	43	20	1	2	10	9	9	10	9	10	10	10	77	6	5	5	5	5	6	6	6	6	7	6	7	70	8	7	8	8	7	8	8	7	8	8	8	8	93
1	17	80	90		2	2	1	2	1	23	1	1	2	10	9	10	10	9	10	10	10	78	6	4	4	4	4	4	5	5	4	4	4	4	52	5	6	6	6	6	6	7	5	5	5	5	5	67
1	18	70	90		6	2	3	2	2	48	26	1	1	9	9	9	9	9	10	10	9	74	8	7	7	7	6	6	6	6	7	7	7	8	82	9	8	8	8	7	7	8	8	8	8	8	9	96
1	19	90	90	90	6	2	1	2	2	46	24	1	2	10	10	10	10	9	10	10	10	79	6	6	6	6	4	4	4	4	4	4	4	4	56	8	9	10	10	8	9	8	8	8	8	8	8	102	10
1	20	70	70		6	2	3	2	2	46	22	1	2	10	10	9	10	8	10	10	10	77	10	6	7	6	5	5	6	8	8	8	7	9	85	10	6	7	7	6	7	7	7	7	7	7	9	87
1	21	90	90	90	6	2	2	2	1	46	22	1	2	9	9	10	9	10	10	10	10	77	4	4	4	3	4	4	4	4	4	5	5	5	50	8	7	7	7	6	6	7	6	7	7	7	7	82	6
1	22	80	90	90	6	3	2	2	2	36	14	1	1	10	9	9	10	8	9	9	8	72	7	7	7	7	7	6	6	7	7	7	8	8	84	9	9	9	9	10	10	10	10	9	9	9	10	113	10
1	23	50	70	90	6	3	5	2	2	36	14	2	1	10	10	10	10	10	10	10	10	80	8	9	9	9	6	6	6	6	7	7	5	6	84	9	9	9	9	9	9	9	9	9	8	8	9	106	9
1	24	80	90	90	6	2	2	2	2	45	21	1	1	10	9	9	10	8	9	9	9	73	5	5	5	5	5	5	5	5	5	5	5	5	60	9	9	9	9	9	9	9	9	9	9	9	9	108	10
1	25	90	80	90	6	2	1	2	2	38	18	2	1	10	10	8	10	8	10	10	10	76	10	10	10	10	8	8	9	8	8	8	9	10	108	10	10	10	10	9	10	10	9	10	9	10	10	117	9
1	26	90	80	80	2	2	1	2	1	22	1	2	2	10	9	9	10	9	9	9	9	74	6	7	7	7	4	1	5	6	6	6	6	7	68	8	8	8	9	6	4	5	6	6	7	7	9	83	7
1	27	90	90		6	2	5	2	1	44	22	1	2	10	10	10	10	10	10	10	10	80	6	5	8	9	6	6	5	5	5	5	5	5	70	7	7	7	8	7	7	7	7	7	7	7	7	85
1	28	80	80	90	5	2	1	2	1	30	7	2	1	9	8	8	8	9	10	10	10	72	5	7	7	10	5	5	4	4	4	4	3	5	63	5	7	7	7	6	5	5	4	4	3	3	3	59	8
1	29	90	80	80	5	2	2	2	1	28	6	1	2	9	9	9	9	9	9	9	9	72	6	7	7	7	1	5	6	6	5	6	6	5	67	8	9	9	9	7	6	8	8	8	8	8	8	96	7
1	30	90	90	80	6	3	1	2	1	38	18	1	1	10	10	10	10	10	10	10	10	80	7	7	8	8	5	5	6	6	7	7	6	6	78	9	10	10	10	8	7	7	8	9	8	10	10	106	7
1	31	50	80	80	6	2	2	2	2	30	8	1	1	8	7	7	7	6	8	8	8	59	6	5	5	5	5	5	5	5	5	5	5	5	61	8	7	7	7	6	6	7	6	7	7	6	9	83	7
1	32	40	40	30	5	2	1	2	1	32	10	2	2	8	8	8	8	8	9	9	9	67	5	5	5	5	5	4	4	4	4	4	4	5	54	6	6	7	7	7	7	7	7	7	7	7	7	82	7
1	33	70	90	90	2	2	1	2	1	23	1	1	2	7	8	7	9	8	10	10	9	68	6	8	6	6	5	6	7	7	7	6	7	6	77	8	9	9	9	7	7	7	8	9	8	8	8	97	8
1	34	60	90	90	6	2	2	2	2	36	15	2	2	8	8	8	8	8	8	8	9	65	5	4	4	4	3	3	3	4	4	4	4	3	45	5	5	5	5	4	4	4	4	5	5	4	4	54	5
1	35	60	50	30	5	2	5	2	2	37	15	2	2	9	9	9	9	9	9	9	9	72	4	3	4	3	2	2	3	4	4	4	3	4	40	4	3	4	4	3	3	4	3	3	3	3	3	40	3
1	36	80	90	90	6	2	1	2	2	41	23	1	2	10	10	10	10	10	10	10	10	80	5	7	6	6	5	3	3	4	4	4	4	5	56	8	9	8	9	9	9	9	9	9	9	9	9	106	10
1	37	30	60		5	2	1	2	2	30	9	2	2	8	8	8	8	8	9	9	9	67	3	5	5	5	2	3	3	4	4	4	4	6	48	4	4	4	4	3	3	4	4	4	4	4	5	47
1	38	80	80	90	6	2	1	2	1	36	12	1	1	10	10	10	10	10	10	10	10	80	6	6	6	6	6	6	6	6	6	5	6	6	71	8	8	8	8	6	6	6	7	7	7	7	8	86	7
1	39	40	80		6	2	2	2	1	28	6	1	2	10	10	10	10	10	10	10	10	80	6	4	7	6	3	1	4	2	2	2	3	2	42	8	7	8	8	7	7	9	9	9	10	9	9	100
1	40	80	90		5	2	1	2	1	27	5	1	1	10	10	10	10	10	10	10	10	80	8	8	8	8	8	8	8	8	8	8	8	8	96	9	9	9	9	9	9	9	9	9	9	9	9	108
1	41	90	60		3	2	2	2	1	23	2	2	2	8	8	7	9	8	8	8	8	64	6	5	5	4	5	4	5	4	5	5	5	5	58	6	6	6	7	6	6	6	7	7	7	7	6	77
1	42	70	80		5	2	1	2	1	28	6	1	2	9	8	8	9	8	9	9	9	69	5	6	7	6	6	6	6	6	6	6	6	6	72	6	7	7	7	7	7	7	7	7	7	7	7	83
1	43	60	60	60	2	2	1	2	1	24	1	2	2	10	10	10	10	10	10	10	10	80	6	8	8	9	9	6	7	6	6	6	6	6	83	6	9	9	9	8	8	8	8	8	8	8	8	97	6
1	44	70	90	90	6	2	1	2	2	48	26	1	2	9	9	9	9	9	9	10	10	74	5	4	5	5	3	3	3	3	3	3	3	3	43	7	8	8	8	8	7	8	8	8	8	8	8	94	8
1	45	70	80	80	2	2	2	2	1	23	1	1	2	8	8	8	8	8	8	8	8	64	6	6	6	7	5	5	5	5	5	5	5	6	66	6	6	6	8	6	6	6	6	6	6	6	7	75	7
1	46	90	90		6	2	1	2	1	40	16	1	2	10	10	10	10	10	10	10	10	80	6	6	6	6	6	6	6	6	6	6	6	6	72	8	8	8	8	8	8	8	8	8	8	8	8	96
1	47	40	70	40	2	2	2	2	1	23	1	2	2	7	7	7	8	8	8	8	8	61	4	4	4	4	4	4	4	4	4	4	4	4	48	7	7	6	6	6	6	6	6	6	6	6	6	74	7
1	48	60	90	70	3	2	1	2	1	20	2	2	2	10	10	10	10	10	10	10	10	80	5	6	6	6	5	4	4	4	5	4	4	4	57	6	7	7	7	6	6	7	6	6	6	6	6	76	7
1	49	60	90	60	2	2	2	2	1	24	1	2	2	8	8	7	8	7	8	8	8	62	5	5	6	5	4	4	6	4	6	5	4	4	58	5	5	6	5	5	5	6	5	6	6	6	6	66	5
1	50	50	70	90	5	2	4	2	1	34	13	2	2	10	10	10	10	10	10	10	10	80	5	6	6	6	5	5	5	5	6	6	6	7	68	6	6	6	7	7	7	7	7	7	7	7	7	81	8
1	51	20	50	60	5	1	2	2	1	28	7	2	2	8	7	6	6	7	8	9	9	60	2	4	4	6	3	4	3	4	3	3	3	3	42	4	5	5	8	4	5	5	3	5	4	4	4	56	7
1	52	30	80	90	6	2	4	2	2	46	21	1	2	10	10	10	10	10	10	10	10	80	5	5	5	5	5	5	5	5	5	5	5	5	60	6	5	7	7	5	5	7	7	6	5	6	5	71	7
1	53	70	90	60	5	1	2	2	2	39	10	2	2	9	9	9	9	9	9	10	9	73	5	5	5	7	5	5	5	5	5	5	5	5	62	6	7	7	8	5	5	5	5	5	5	5	5	68	7
1	54	50	60	60	2	2	3	1	1	23	2	2	2	10	10	10	10	10	10	8	9	77	3	3	3	5	1	2	3	3	3	3	2	3	34	8	9	9	9	7	8	7	6	6	6	7	7	89	5
1	55	50	80	90	6	2	2	2	1	31	8	2	2	6	7	7	7	7	8	8	8	58	5	5	6	6	5	5	6	5	6	5	6	5	65	6	6	7	7	6	7	7	6	7	6	7	7	79	6
1	56	60	70	80	4	2	1	2	1	25	3	2	2	9	10	9	10	10	9	9	9	75	2	4	4	5	3	3	3	3	3	3	3	4	40	5	5	5	6	5	4	4	5	5	5	5	5	59	4
1	57	50	40	30	2	2	1	2	1	24	3	1	2	9	9	10	9	10	9	9	7	72	7	5	5	5	5	5	5	5	5	5	5	5	62	7	5	5	5	5	5	5	5	5	5	5	5	62	5
1	58	30	50	70	6	2	1	2	2	45	23	2	2	10	10	10	10	10	10	10	10	80	5	6	6	5	5	5	5	5	6	6	6	6	66	7	7	7	7	7	7	7	7	7	7	7	7	84	8
1	59	50	50		2	2	1	2	1	24	3	2	2	10	10	10	10	10	10	10	10	80	6	5	6	6	5	4	5	5	5	4	4	6	61	6	6	6	6	6	6	6	6	6	6	6	6	72
1	60	30	70		6	2	4	2	2	53	27	2	2	10	10	10	10	10	10	10	10	80	5	5	5	5	5	5	5	5	5	5	5	5	60	6	5	7	7	5	5	7	7	6	5	6	5	71
1	61	60	70	80	5	2	1	2	1	29	7	1	2	6	6	6	6	6	7	7	7	51	5	2	2	4	1	1	3	1	1	1	1	2	24	6	6	6	6	6	6	6	6	6	6	6	6	72	5
1	62	80	80	70	2	2	1	2	1	24	1	1	1	8	8	7	8	7	9	9	8	64	8	7	7	7	6	7	7	7	7	7	7	7	84	9	8	8	8	7	7	7	7	7	7	7	7	89	8
1	63	80	60	70	6	2	1	2	1	30	7	1	2	9	9	9	9	9	10	10	10	75	5	5	5	5	5	5	5	5	5	5	5	5	60	5	5	5	5	5	5	5	5	5	5	5	5	60	5
1	64	80	80	70	2	2	1	2	1	23	1	1	1	8	8	7	8	8	9	8	8	64	7	7	7	8	6	6	6	6	8	7	6	6	80	8	8	8	9	7	8	9	8	8	8	8	7	96	8
1	65	50	50		5	3	1	2	1	30	7	2	1	10	10	10	10	10	10	10	10	80	7	7	7	7	7	7	7	7	7	7	7	7	84	7	7	7	7	7	7	7	7	7	7	7	7	84
1	66	90	90	90	6	3	1	2	2	41	20	1	1	10	10	10	10	10	10	10	10	80	8	7	7	9	8	6	7	6	7	8	8	8	89	9	10	10	10	9	9	9	9	10	10	9	10	114	8
1	67	50	60		5	2	3	2	2	27	6	2	2	10	10	10	9	9	10	10	10	78	5	6	6	9	2	3	7	3	3	3	3	2	52	6	7	7	7	4	4	4	5	6	7	7	7	71
1	68	90	90	100	6	2	2	2	2	43	22	1	1	10	10	10	10	10	10	10	10	80	8	8	8	9	7	7	7	7	7	7	7	8	90	8	9	9	9	8	8	8	8	8	9	9	9	102	8
1	69	70	70	80	6	2	2	2	1	38	15	1	2	9	10	10	10	10	10	10	10	79	5	5	5	5	5	5	5	5	5	5	5	5	60	9	9	9	9	9	9	9	9	9	9	9	9	108	9
1	70	60	80	70	5	2	2	2	1	36	15	2	2	10	10	10	10	10	10	10	10	80	5	5	5	4	2	2	3	3	3	3	3	5	43	5	6	7	7	7	6	7	7	7	6	7	7	79	5
1	71	70	90		5	1	1	2	1	35	13	2	2	8	8	8	7	7	8	8	9	63	4	4	4	4	3	3	3	4	4	3	4	4	44	6	5	6	6	5	6	5	5	5	5	5	5	64
1	72	50	50		2	2	2	2	1	23	1	2	2	9	10	10	8	10	10	9	9	75	7	8	8	8	6	6	6	7	7	7	8	8	86	8	8	8	8	8	8	9	9	8	8	8	7	97
1	73	80	90		6	2	1	2	1	35	14	1	2	9	10	9	9	10	10	10	10	77	5	4	5	4	3	3	4	4	4	4	5	5	50	7	7	8	8	7	7	8	8	8	7	8	8	91
1	74	60	90		4	1	2	2	1	39	17	2	2	7	7	7	7	7	8	8	8	59	6	6	7	6	5	5	5	6	7	6	6	6	71	8	8	8	8	7	8	8	8	8	8	8	8	95
1	75	60	90		5	1	1	2	2	33	9	2	2	6	6	6	5	5	7	6	6	47	5	5	5	7	5	5	5	5	6	6	5	5	64	5	5	5	5	5	5	5	5	5	5	5	5	60
2	1	50	80	80	6	2	2	2	2	42	19	2	2	10	10	10	10	10	10	10	10	80	4	2	3	3	3	3	3	3	3	3	3	2	35	6	7	8	8	8	7	8	7	7	8	8	8	90	7
2	2	50	80	90	6	2	2	2	1	34	12	2	2	10	10	10	9	9	10	10	10	78	3	3	2	2	3	2	2	3	1	1	1	1	24	9	9	8	8	7	8	8	8	8	8	9	8	98	9
2	3	90	90	80	2	2	1	2	1	23	1	1	2	9	9	9	9	9	9	9	9	72	7	6	7	6	5	7	7	6	8	8	7	9	83	8	9	9	9	9	8	8	8	9	8	8	8	101	9
2	4	60	70	60	3	2	1	2	1	24	1	1	2	6	6	7	8	8	7	7	8	57	1	3	3	6	3	2	3	3	2	2	2	2	32	5	6	7	7	6	6	7	6	6	6	7	8	77	5
2	5	80	90		2	2	1	2	1	23	1	2	2	9	9	10	10	10	10	10	10	78	5	7	6	7	5	5	6	5	5	5	6	8	70	5	7	7	8	8	7	8	8	8	8	8	8	90
2	6	70	90	90	6	2	1	2	1	37	13	1	1	9	9	9	9	9	9	9	9	72	6	5	5	5	4	4	4	4	4	3	3	3	50	8	8	8	8	6	6	9	7	9	9	9	9	96	7
2	7	50	90		3	1	1	2	1	22	1	2	2	7	8	9	7	8	10	10	10	69	7	7	7	10	8	7	7	7	7	7	7	8	89	8	9	9	9	7	7	7	8	9	8	8	8	97
2	8	30	60		6	2	1	2	1	40	15	2	2	8	8	8	8	8	8	8	8	64	8	8	8	8	8	8	8	9	9	9	9	9	101	3	3	3	3	2	2	2	2	3	3	3	3	32
2	9	80	80	70	6	2	2	2	2	40	20	1	2	9	9	9	9	9	10	10	10	75	3	1	3	3	0	0	3	3	6	6	4	8	40	7	7	7	7	7	7	7	7	7	7	7	7	84	6
2	10	100	100	90	6	3	5	2	2	58	37	1	2	8	8	8	10	9	9	9	9	70	8	6	5	5	5	4	6	7	6	7	7	7	73	10	8	8	8	8	7	9	8	9	8	8	8	99	10
2	11	70	100	70	6	2	5	2	2	50	30	1	2	10	10	10	10	10	10	10	8	78	6	6	6	7	5	6	6	6	6	6	6	6	72	8	8	8	7	6	7	8	8	7	8	6	6	87	7
2	12	50	80	70	4	1	2	2	1	26	4	2	2	10	10	10	10	10	10	10	10	80	1	2	0	0	3	4	3	2	1	1	1	1	19	6	7	7	7	5	6	6	6	7	6	5	6	74	6
2	13	70	100	100	4	2	4	2	1	26	3	2	2	8	5	6	8	8	8	8	8	59	5	5	5	4	2	0	5	3	3	5	3	4	44	8	8	8	8	6	6	7	7	6	6	6	6	82	8
2	14	40	90	50	5	2	1	2	1	28	6	2	2	8	8	8	8	8	8	8	8	64	5	5	4	4	4	4	5	5	5	5	5	5	56	7	6	7	7	6	6	6	6	6	6	6	6	75	5
2	15	60	90	90	6	2	1	2	1	36	14	1	2	7	7	7	7	7	7	7	7	56	3	3	3	3	3	3	4	4	4	4	4	4	42	7	6	6	6	5	5	5	5	5	4	4	5	63	6
2	16	70	90		6	2	2	2	2	43	21	1	1	9	9	9	9	9	9	9	9	72	6	7	7	7	7	7	7	6	6	7	7	7	81	8	8	8	8	8	8	8	8	8	8	8	8	96
2	17	50	90		5	1	4	2	3	42	22	1	2	9	9	9	9	9	10	10	10	75	2	4	4	10	3	3	3	10	10	10	10	10	79	7	7	8	8	6	6	7	7	7	7	7	8	85
2	18	70	80	90	6	2	2	2	2	41	20	1	1	9	9	9	9	9	9	9	9	72	8	6	7	7	4	5	4	5	5	5	5	5	66	8	8	8	8	8	8	8	7	7	7	7	7	91	8
2	19	90	90	80	6	2	2	2	1	41	17	1	2	10	10	10	10	10	10	10	10	80	8	8	7	8	8	8	8	8	7	8	8	8	94	10	10	10	10	9	9	9	9	9	10	9	9	113	9
2	20	40	90	90	6	2	2	2	2	42	20	1	2	10	10	10	10	10	10	10	10	80	7	5	5	5	5	5	5	5	5	5	5	7	64	8	8	8	8	8	8	8	8	8	8	7	7	94	8
2	21	40	90	80	6	2	2	2	1	37	17	1	2	9	9	9	10	10	10	10	10	77	8	7	7	7	7	7	7	7	7	7	7	8	86	8	8	8	9	8	8	8	8	9	9	9	9	101	8
2	22	40	80		2	2	3	2	1	23	1	2	2	9	9	9	10	10	10	10	9	76	6	6	8	5	5	5	7	7	7	6	5	5	72	8	8	8	8	8	8	8	8	8	8	8	8	96
2	23	60	80		2	2	1	2	1	23	1	1	1	10	10	10	10	10	10	10	10	80	6	6	6	6	6	6	6	6	6	6	6	6	72	6	6	7	4	4	4	6	6	6	6	6	7	68
2	24	20	70	80	2	2	3	2	1	23	1	1	2	8	7	8	9	8	8	9	9	66	8	7	8	7	7	5	6	7	7	7	8	8	85	8	7	7	8	7	7	8	8	7	7	8	8	90	8
2	25	70	90	90	5	3	2	2	1	27	5	1	1	8	8	8	8	8	8	8	8	64	5	5	5	5	4	4	5	4	5	4	4	5	55	7	7	7	7	7	7	7	7	8	8	8	8	88	6
2	26	50	60	60	4	2	1	2	1	25	6	1	2	8	7	7	5	9	10	10	9	65	4	3	3	3	3	3	3	3	5	4	5	6	45	7	9	9	9	7	7	7	6	7	7	7	8	90	5
2	27	70	90		5	2	2	2	1	53	22	1	2	9	9	9	9	8	8	8	8	68	5	4	4	6	4	4	4	4	5	4	5	5	54	6	4	5	5	4	4	5	4	5	4	4	4	54
2	28	70	70		6	3	1	2	2	43	22	1	2	10	10	10	10	10	10	10	10	80	9	9	9	9	5	8	7	6	7	7	7	7	90	8	8	8	8	8	8	8	8	8	8	8	8	96
2	29	50	90		6	2	3	1	2	38	12	1	2	8	7	8	9	9	9	9	9	68	5	3	2	3	3	3	4	5	4	3	3	3	41	7	7	7	7	7	8	8	8	8	7	7	7	88
2	30	20	30		5	2	1	2	3	37	14	2	2	7	7	8	9	9	9	9	9	67	4	8	6	4	6	4	5	8	8	8	7	7	75	7	7	7	8	8	7	8	7	7	8	8	8	90
2	31	80	90	80	6	2	1	2	1	44	22	1	2	9	9	9	9	9	9	9	9	72	4	5	5	5	4	4	4	5	5	5	5	5	56	6	6	6	6	6	6	6	6	6	6	6	7	73	6
2	32	60	90	70	6	2	1	2	2	39	18	1	2	10	10	10	10	10	10	10	10	80	5	7	7	7	7	5	7	5	6	5	5	6	72	6	6	6	6	6	6	6	6	6	6	6	7	73	7
2	33	40	70	40	4	1	1	2	2	28	6	2	2	8	8	8	8	8	8	8	8	64	3	4	7	7	4	4	4	3	5	4	4	4	53	5	5	5	7	5	5	5	5	5	5	5	5	62	5
2	34	40	70	80	2	2	3	2	1	23	1	2	2	10	10	10	10	10	10	10	10	80	5	5	5	5	5	5	5	5	5	5	5	6	61	7	7	6	7	6	7	7	6	7	7	7	8	82	6
2	35	70	90	70	5	3	2	2	2	31	7	2	2	9	9	9	8	9	9	9	9	71	5	5	8	9	7	4	6	5	5	8	7	7	76	9	9	9	9	8	7	9	8	8	8	8	9	101	7
2	36	50	90		6	2	2	2	2	40	20	1	2	10	9	10	10	10	10	10	10	79	5	7	10	4	4	3	3	3	3	4	4	4	54	9	9	10	8	8	7	8	8	9	9	9	8	102
2	37	50	80	50	6	2	1	2	2	38	15	2	2	10	10	10	10	10	10	10	10	80	5	5	5	5	0	0	5	4	5	5	5	5	49	9	9	9	8	8	9	8	7	7	7	7	7	95	6
2	38	40	70	80	6	2	2	2	2	38	14	1	2	10	10	10	10	10	10	10	10	80	6	4	4	10	0	1	4	6	7	7	7	4	60	9	9	9	9	7	7	10	10	10	9	9	9	107	10
2	39	90	80	60	3	2	4	1	1	25	2	1	2	10	10	10	10	10	10	10	10	80	5	7	7	6	7	5	5	6	6	7	7	7	75	9	8	10	9	7	8	9	10	9	8	9	10	106	7
2	40	70	90	90	6	2	1	2	1	40	20	1	2	10	9	10	10	10	10	10	10	79	7	8	8	8	7	6	6	5	6	7	6	8	82	9	9	9	9	8	8	9	8	8	8	9	9	103	8
2	41	30	60	80	6	3	1	2	1	41	24	1	1	9	9	9	9	9	9	9	9	72	3	3	2	3	2	5	5	5	5	5	5	5	48	8	8	8	8	8	8	8	8	8	8	8	8	96	6
2	42	60	80	60	2	2	1	2	1	24	1	2	2	10	10	10	10	10	10	10	10	80	2	4	4	3	2	2	2	2	3	2	3	2	31	6	7	7	7	7	5	7	7	7	7	6	6	79	5
2	43	80	100	90	6	3	1	2	2	41	20	1	1	10	10	10	10	10	10	10	10	80	10	10	10	10	7	8	10	10	10	10	10	10	115	10	10	10	9	7	8	9	9	9	9	9	10	109	10
2	44	40	80	70	2	2	3	2	1	23	1	1	2	6	5	6	7	7	7	7	7	52	4	4	4	4	4	4	4	4	4	4	4	4	48	7	8	8	8	6	6	6	6	7	6	6	7	81	8
2	45	50	70	40	4	2	1	2	1	25	3	2	2	8	8	8	8	8	8	8	8	64	5	4	7	5	5	5	5	5	5	5	7	7	65	7	6	6	6	6	6	6	6	6	7	6	6	74	7
2	46	50	40		6	2	4	2	2	48	23	1	2	8	8	9	8	9	8	8	8	66	4	5	6	5	4	5	7	5	6	6	6	6	65	6	6	6	6	6	6	7	7	7	8	8	7	80
2	47	90	100	90	6	2	1	2	2	42	21	1	1	10	10	10	10	10	10	10	10	80	6	5	5	5	5	5	5	5	5	5	5	5	61	8	8	8	8	8	8	8	8	8	8	8	8	96	8
2	48	100	100	90	6	2	1	2	2	48	24	1	1	10	10	10	10	10	10	10	10	80	4	4	4	3	2	4	5	4	7	4	4	4	49	8	8	8	8	8	8	9	8	9	9	8	8	99	8
2	49	50	100	80	6	3	1	2	2	50	30	1	2	10	10	9	10	9	10	9	9	76	6	6	6	6	5	5	6	7	6	7	6	6	72	9	8	8	8	8	8	9	9	9	9	9	8	102	8
2	50	50	80	60	6	2	2	2	1	28	6	2	2	8	8	8	8	8	8	8	8	64	8	7	9	10	9	8	9	8	8	8	8	8	100	7	7	8	9	8	7	8	8	8	8	8	8	94	8
2	51	80	90	80	6	2	1	2	1	35	12	1	1	9	9	9	9	9	9	9	9	72	7	8	8	8	8	8	8	8	8	8	8	10	97	10	9	9	9	9	9	9	9	9	9	9	9	109	9
2	52	70	90	80	5	1	1	2	1	26	6	2	2	8	8	8	8	10	9	10	8	69	5	3	3	3	0	0	0	0	0	0	0	0	14	8	8	8	8	8	8	8	8	8	8	8	8	96	5
2	53	50	90		5	2	1	2	1	32	9	2	2	7	6	6	6	7	8	8	8	56	5	5	5	5	5	5	5	5	4	5	5	5	59	6	6	7	6	6	6	6	6	6	6	6	6	73
2	54	60	90	70	6	2	1	2	1	37	17	1	2	8	8	8	8	8	8	8	8	64	4	4	5	6	4	3	4	7	7	7	7	7	65	8	8	8	8	8	8	8	8	8	8	8	8	96	8
2	55	90	80	90	5	2	1	2	1	26	6	1	1	10	10	10	10	10	10	10	10	80	7	8	10	10	8	7	7	7	6	7	7	10	94	8	8	8	8	8	8	8	8	8	8	8	8	96	10
2	56	60	80	70	6	2	1	2	2	43	24	1	2	8	8	8	8	8	9	8	8	65	5	3	5	5	5	3	5	6	8	8	8	8	69	8	8	8	8	7	7	6	6	7	6	6	7	84	7
2	57	60	50		6	2	1	2	2	35	12	2	2	10	10	10	10	10	10	10	10	80	5	3	4	3	4	3	4	3	4	4	3	5	45	6	4	5	5	5	7	7	7	7	7	7	7	74
2	58	80	90	90	2	2	3	2	1	23	1	1	2	8	8	8	8	8	8	8	8	64	7	7	8	7	6	5	7	7	8	7	7	8	84	7	8	8	8	8	8	8	8	8	8	8	8	95	8
2	59	50	90	80	6	2	2	2	2	40	20	1	2	9	9	9	9	10	9	9	9	73	10	8	6	6	6	6	6	6	8	8	8	7	85	10	8	8	8	6	6	8	8	8	8	8	8	94	7
2	60	80	90		6	2	1	2	1	39	18	1	1	10	10	10	10	10	10	10	9	79	7	8	8	8	7	7	8	8	8	7	7	8	91	8	8	8	9	8	7	8	7	7	8	8	8	94
2	61	50	70	70	2	2	3	2	1	23	1	2	2	8	8	8	8	8	8	9	9	66	6	5	6	4	4	3	5	5	4	6	5	7	60	7	7	7	7	7	7	7	7	7	7	7	7	84	7
2	62	60	70	70	6	2	4	2	2	46	22	1	2	8	8	8	8	8	8	8	8	64	5	3	3	5	1	1	1	3	3	1	1	1	28	8	6	6	6	4	4	4	3	4	4	6	5	60	7
2	63	20	60		3	2	1	2	1	24	2	2	2	10	10	10	9	10	10	10	9	78	3	4	3	3	3	3	3	3	3	3	3	3	37	6	7	7	8	4	3	3	2	4	6	4	5	59
2	64	40	60	60	6	2	1	2	1	36	14	1	1	10	10	10	10	10	10	10	10	80	1	3	2	3	2	4	0	4	3	4	4	2	32	10	10	10	10	10	10	10	10	10	10	10	10	120	6
2	65	30	60	60	5	2	1	2	2	37	14	1	2	10	10	10	10	10	10	10	10	80	5	7	7	7	5	5	7	7	7	8	7	8	80	8	7	8	8	7	7	8	8	8	8	8	10	95	6
2	66	60	80	70	2	2	3	2	1	23	1	2	2	10	10	10	10	10	10	10	10	80	5	5	5	5	5	5	5	5	5	5	5	5	60	10	10	10	10	9	10	9	10	9	10	10	9	116	8
2	67	30	70		2	1	4	2	1	21	1	2	2	10	10	10	10	10	10	10	10	80	5	4	6	3	3	3	4	7	7	6	3	6	57	7	8	8	7	5	5	7	7	8	6	4	7	79
2	68	30	70	50	5	2	1	2	1	27	5	1	2	7	9	7	8	9	9	7	7	63	5	5	6	7	4	4	5	6	6	5	5	6	64	7	7	7	7	6	6	7	6	6	7	6	7	79	6
2	69	60	90	50	6	2	1	2	2	35	15	2	2	9	9	9	9	9	9	9	9	72	1	1	1	1	3	1	5	1	1	1	1	6	23	8	8	8	8	8	8	8	8	8	8	8	8	96	6
2	70	30	40	50	6	2	2	2	1	44	21	2	2	9	9	9	9	9	9	9	9	72	6	7	5	7	7	7	7	7	7	7	7	5	79	5	6	6	7	5	6	8	8	8	7	7	8	81	7
2	71	60	90		6	2	2	2	1	39	15	2	2	9	9	9	9	9	9	9	9	72	3	3	2	3	3	4	4	4	4	4	4	4	42	9	9	9	9	8	9	9	9	9	9	9	9	107
2	72	60	80	70	6	2	4	2	2	47	25	1	1	9	9	9	10	10	10	10	9	76	8	8	8	9	3	3	2	8	9	8	9	8	83	7	8	8	9	7	7	7	7	7	7	7	7	88	7
2	73	80	90	90	6	3	1	2	2	46	24	1	2	10	10	10	10	10	10	10	10	80	2	2	2	2	2	2	2	2	2	2	3	3	26	8	8	8	8	8	8	8	8	8	8	8	8	96	8
2	74	90	90	90	6	3	1	2	2	40	19	1	1	10	10	10	10	10	10	10	10	80	8	5	6	6	5	6	6	6	6	6	6	7	73	10	10	10	9	10	10	9	9	10	9	9	10	115	10
2	75	90	90		6	2	1	2	1	47	30	1	2	9	9	9	10	8	10	10	10	75	8	5	4	6	6	5	7	5	7	6	6	6	71	9	7	8	7	7	7	8	7	7	7	8	8	90
2	76	80	90	90	6	3	2	2	2	41	20	1	2	9	9	9	9	9	9	9	9	72	9	7	7	7	5	5	5	5	5	5	5	6	71	10	8	8	8	7	7	7	7	7	7	7	8	91	9
[truncated: 12 more columns]
